# Supplementary material
Source: PubMed Central journal article supplement (PMC2996615)
Supplement: NIHMS238247-supplement-supp_info.pdf [file NIHMS238247-supplement-supp_info.pdf]

## Supplemental Figure 1

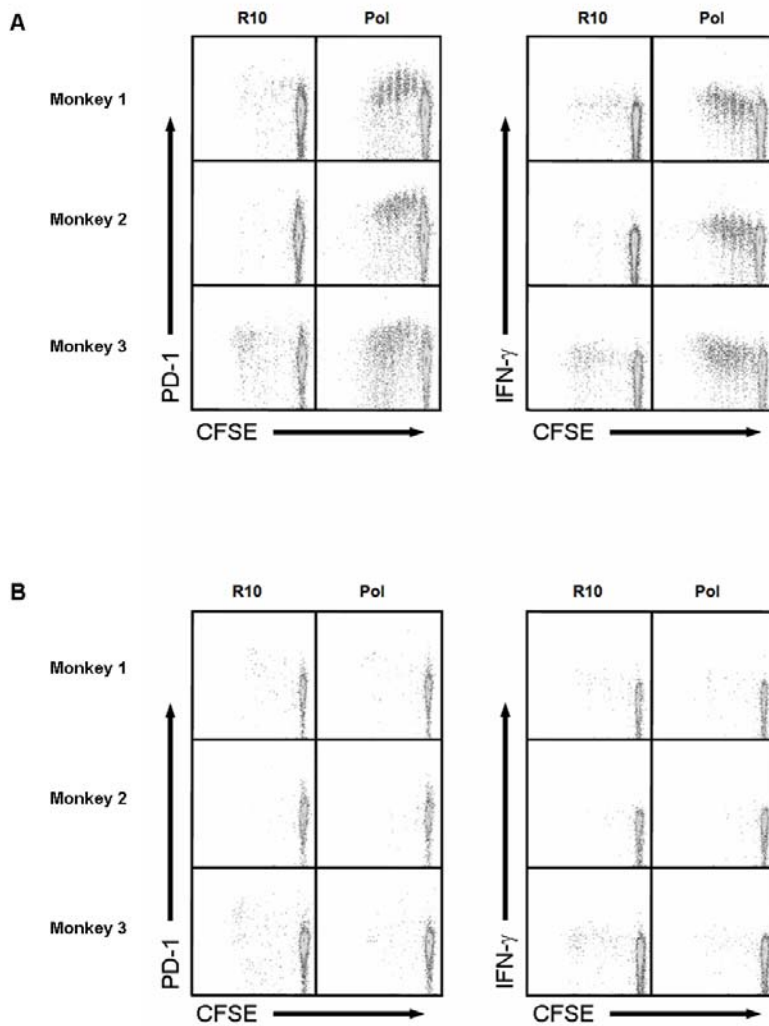

### **Supplemental Figure 1. Temporal PD-1 expression and IFN- $\gamma$ secretion following antigenic stimulation *ex vivo* in DNA immunized and unimmunized macaques.**

Peripheral blood mononuclear cells were isolated from DNA immunized (A) and unimmunized (B) cynomolgus macaques, with data from three representative macaques from each group shown. Cells were labelled with CFSE and stimulated for 5 days with or without SIVpol peptides, with the addition of golgi transport inhibitors added during the final 6 hours of incubation. Cells were then stained for phenotypic markers as well as surface expression of PD-1 and intracellular accumulation of IFN- $\gamma$ .
